# Supplementary material
Source: MDPI journal article supplement (https://www.mdpi.com/2304-6740/11/1/23)
Supplement: s1 [file s1]

Supplementary information  
**Cryogels with Noble Metal Nanoparticles as Catalyst for “Green” Decomposition  
of Chlorophenols**

Dmitriy A. Berillo<sup>1,2</sup>, Irina N. Savina<sup>1</sup>

<sup>1</sup> *School of Applied Sciences, University of Brighton, Huxley Building, Lewes Road,  
Brighton BN2 4GJ, United Kingdom.*

<sup>2</sup> *MINES ParisTech, PSL Research University, Center for Materials Forming  
(CEMEF), UMR CNRS 7635, CS 10207, 06904 Sophia Antipolis, France*

\*Corresponding author (email:dmitriychemist@gmail.com)

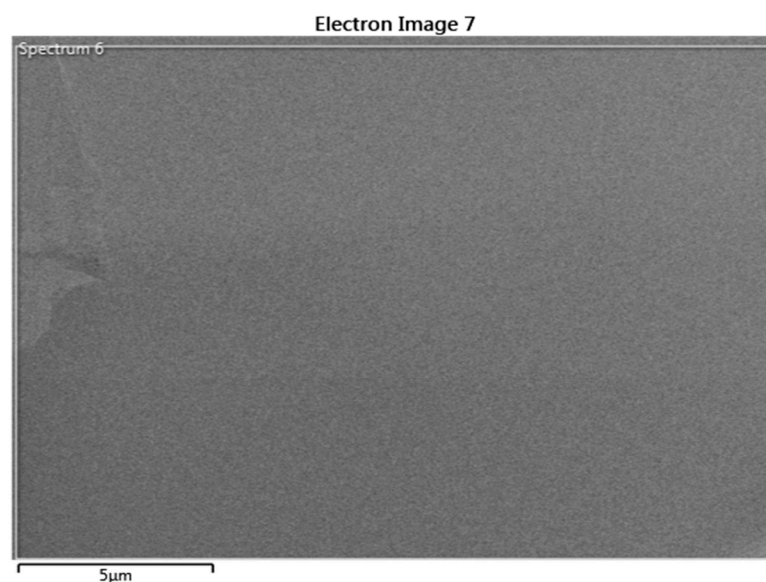

A

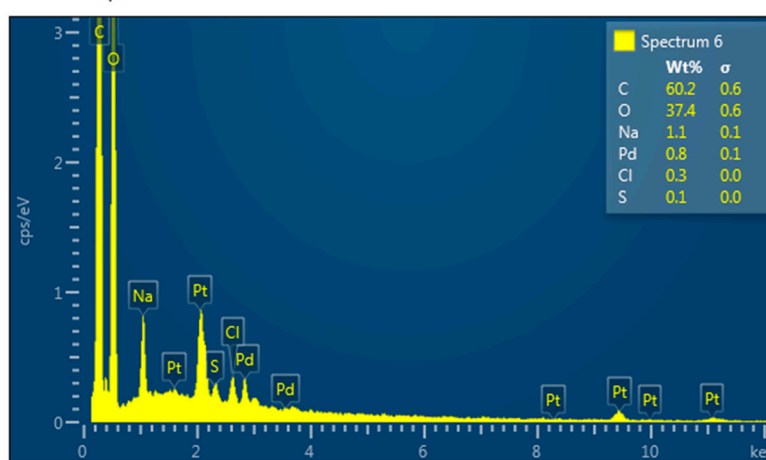

B

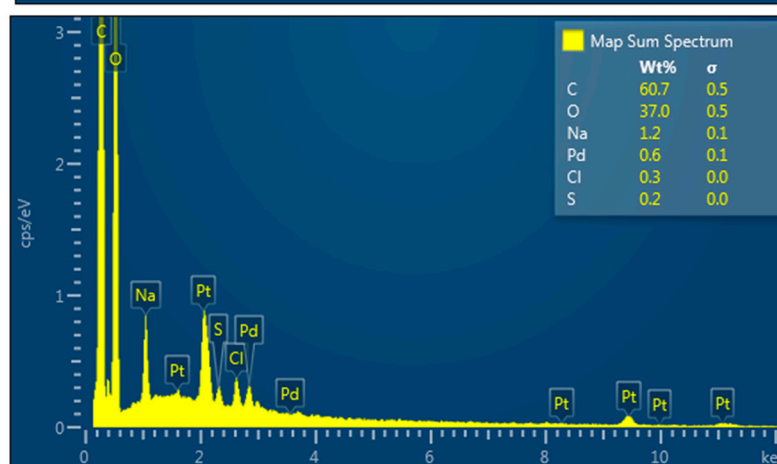

C

**Figure S1.** A) SEM image of CHI-GA-PdNPs cryogel containing 0.6mM PdNPs ; B) Energy-dispersive X-ray spectra of CHI-GA-PdNPs cryogels containing 0.6mM PdNPs C) Energy-dispersive X-ray spectra of CHI-GA-PdNPs 0.4mM.

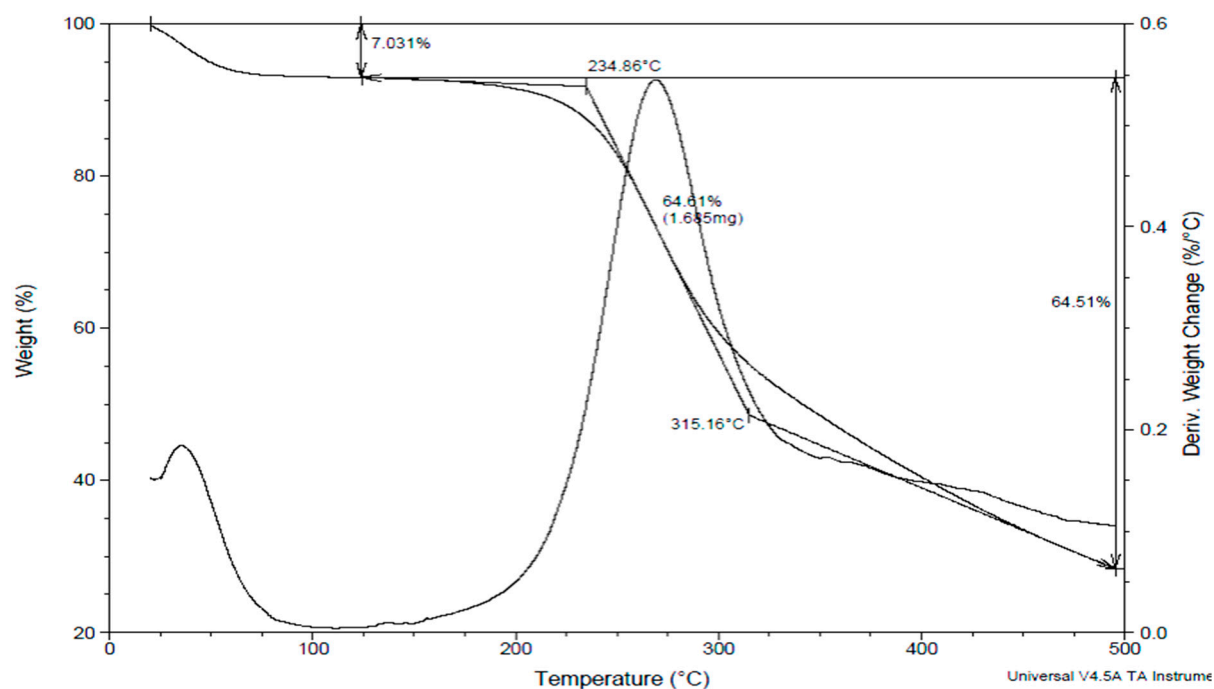

**Figure S2.** TGA of freeze dried cryogel CHI-GA-PdNPs 0.05 mM in air and derivative gravimetric analysis.

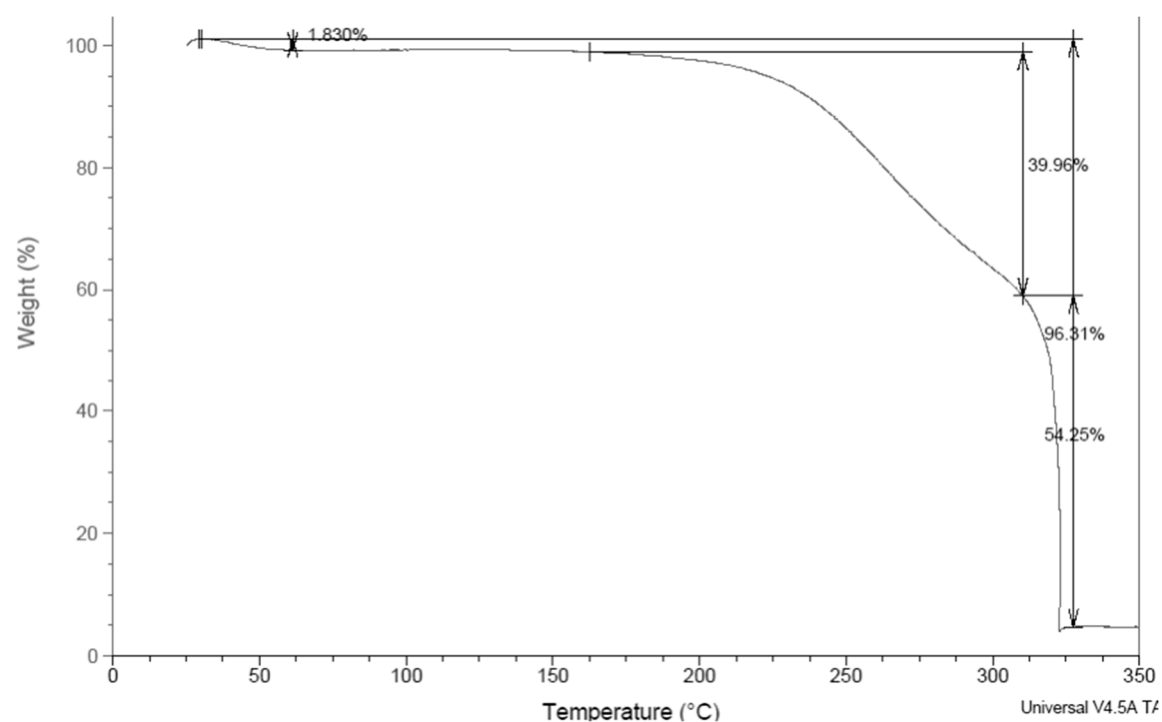

**Figure S3.** TGA of freeze dried CHI-GA-PdNPs 0.2mM cryogel in air.

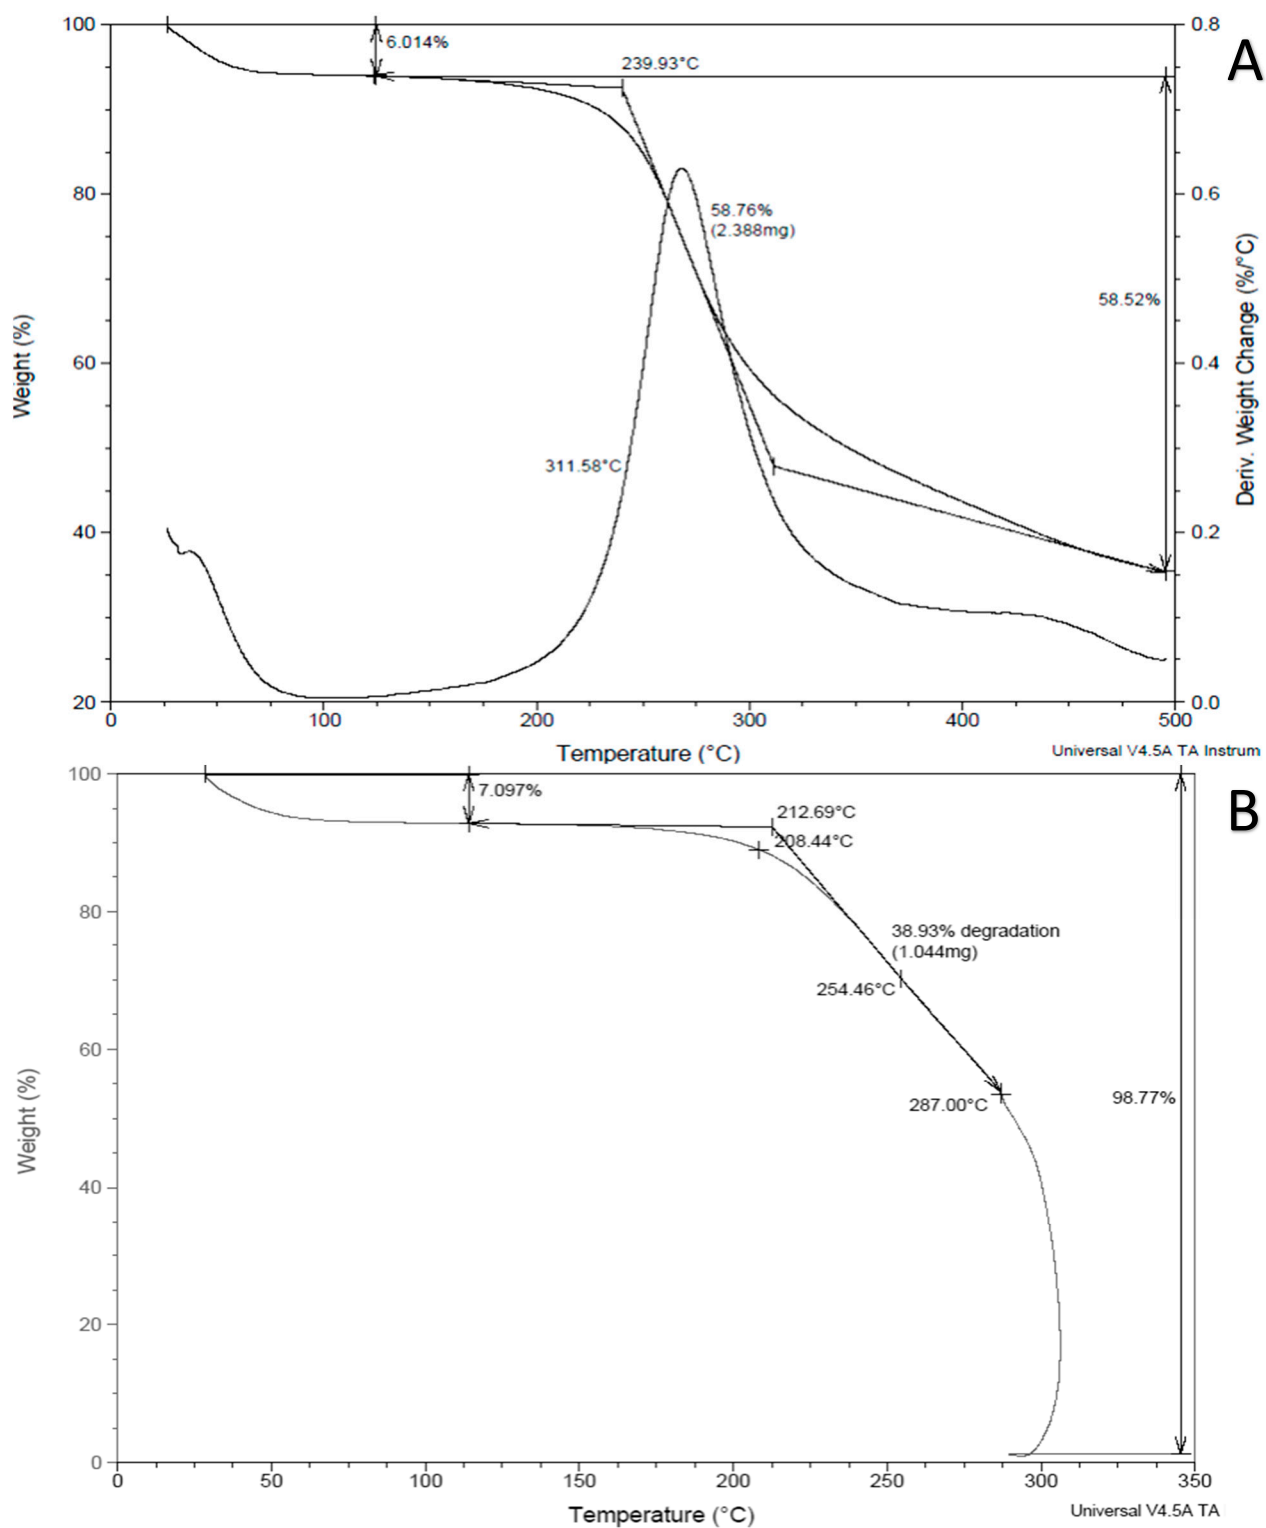

**Figure S4.** TGA of freeze dried: A) cryogel CHI-GA-PdNPs 4 mM in atmosphere of nitrogen and derivative gravimetric analysis. B) hydrogel CHI-GA-PdNPs 4 mM in air.

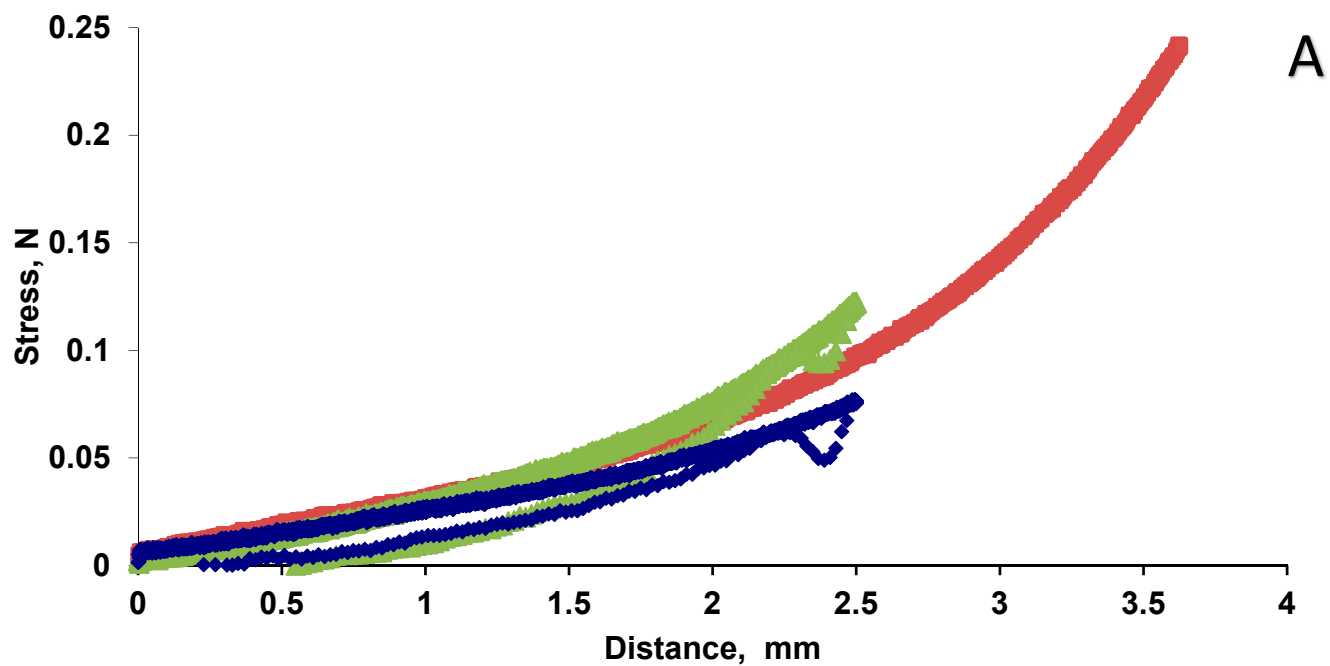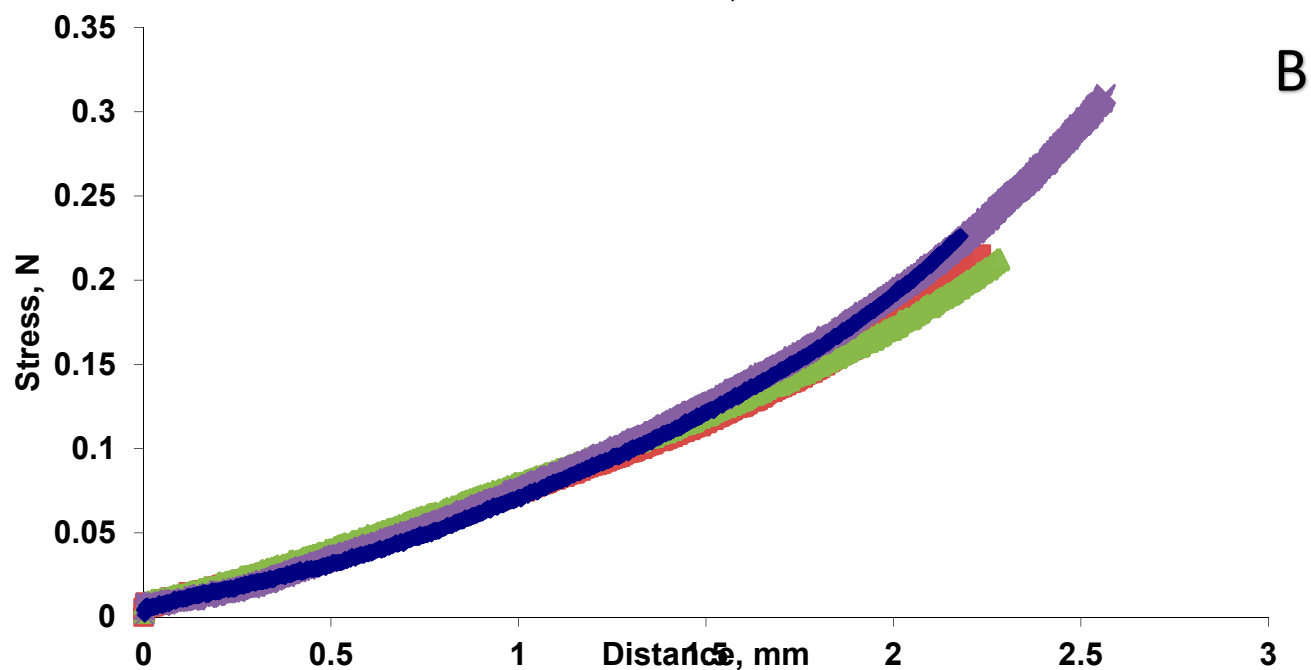

**Figure S5.** Compression test of ionic cryogels: A) freshly synthesized CHI-[PdCl<sub>4</sub>]<sup>2-</sup> 0.8mM; B) CHI-[PdCl<sub>4</sub>]<sup>2-</sup> 0.8mM swollen for 72h in 0.1M HAc.

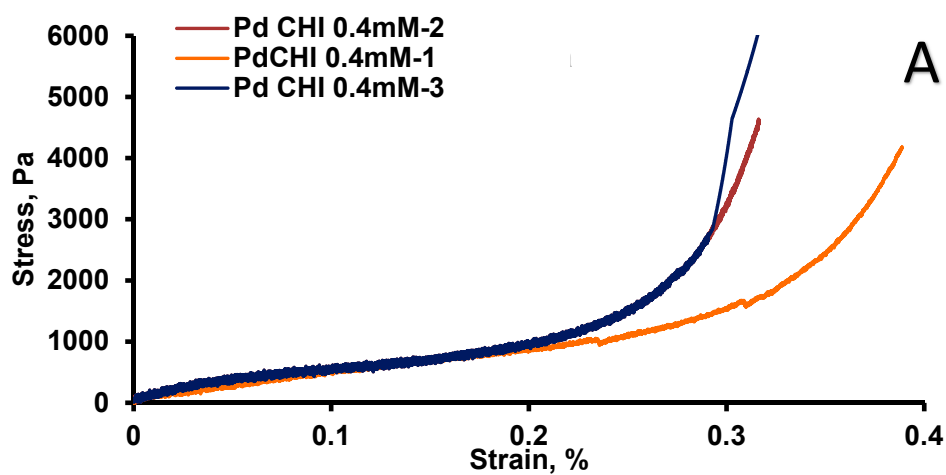

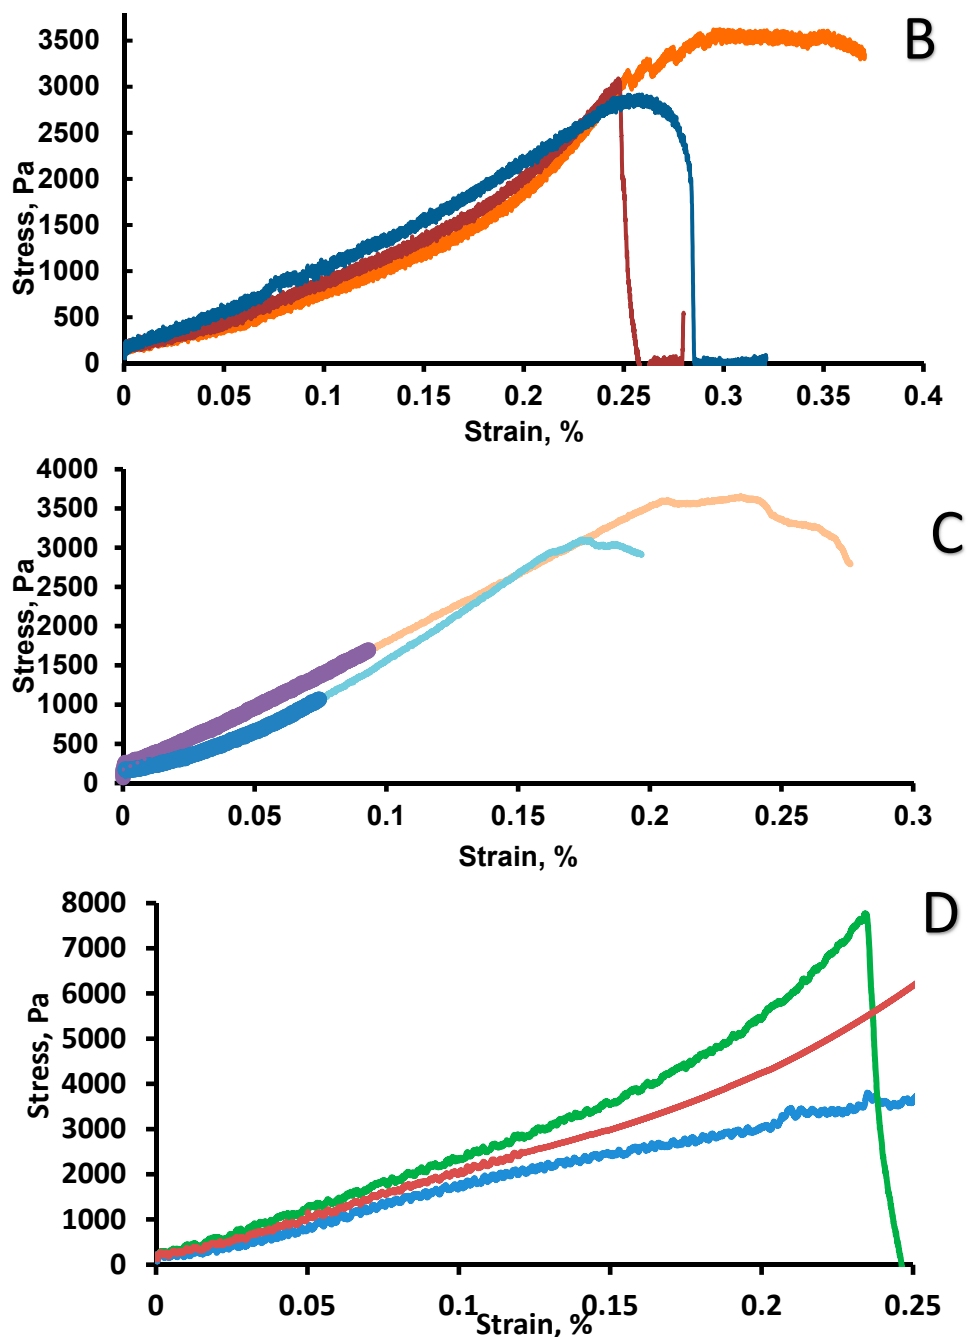

**Figure S6** Representative stress–strain curves of ionic cryogels: A) freshly synthesized  $\text{CHI-}[\text{PdCl}_4]^{2-}$  0.4 mM; B) equilibrium-swollen ionic cryogels  $\text{CHI-}[\text{PdCl}_4]^{2-}$  0.4 mM in water; C) freshly synthesized  $\text{CHI-}[\text{PdCl}_4]^{2-}$  0.2 mM pH 4.7; D) freshly synthesized  $\text{CHI-}[\text{PdCl}_4]^{2-}$  0.6 mM.

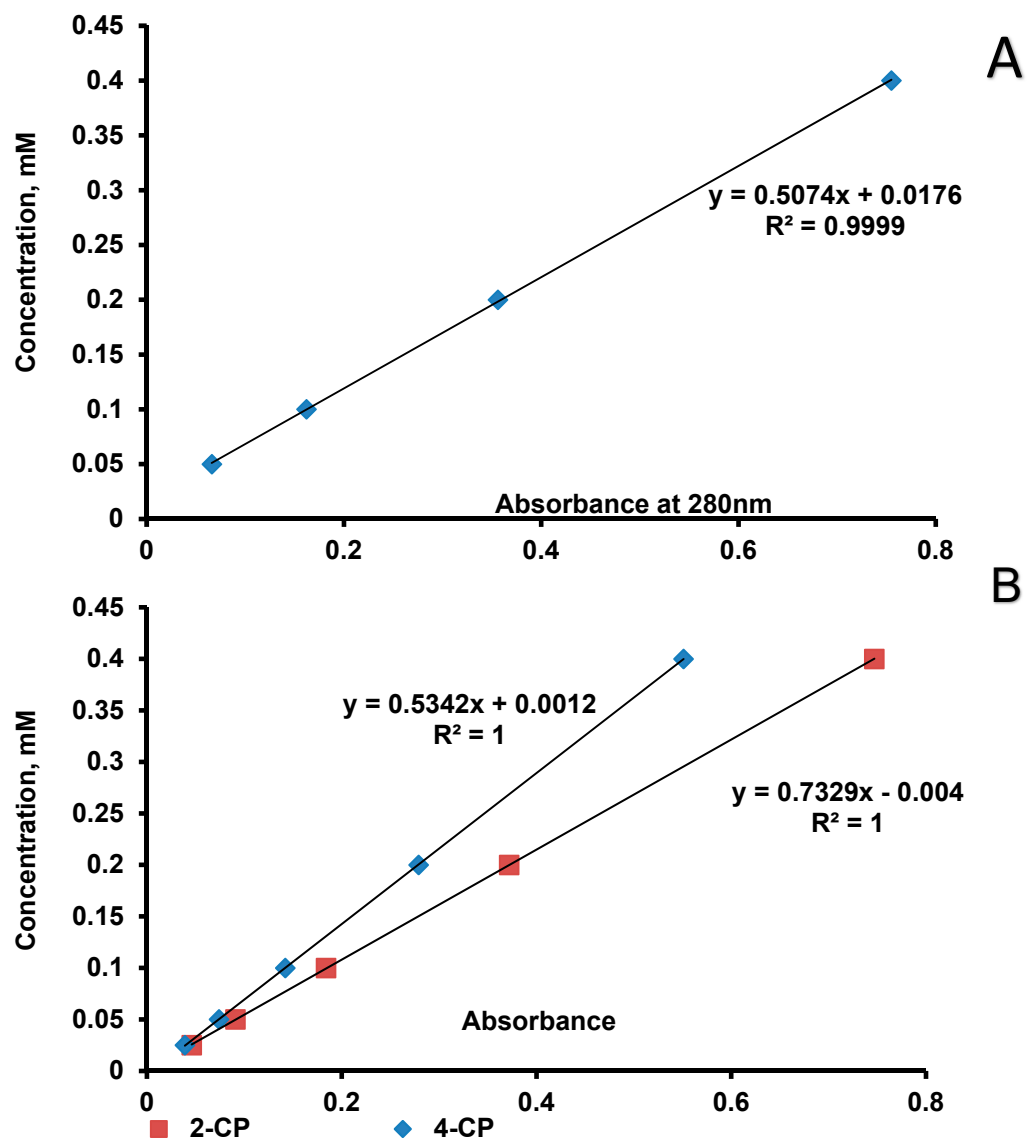

**Figure S7** Calibration curves for chlorophenols using UV spectroscopy at 280nm: A) 2-CP in 20mM HCOOH at pH3; B) 4CP and 2CP in water.

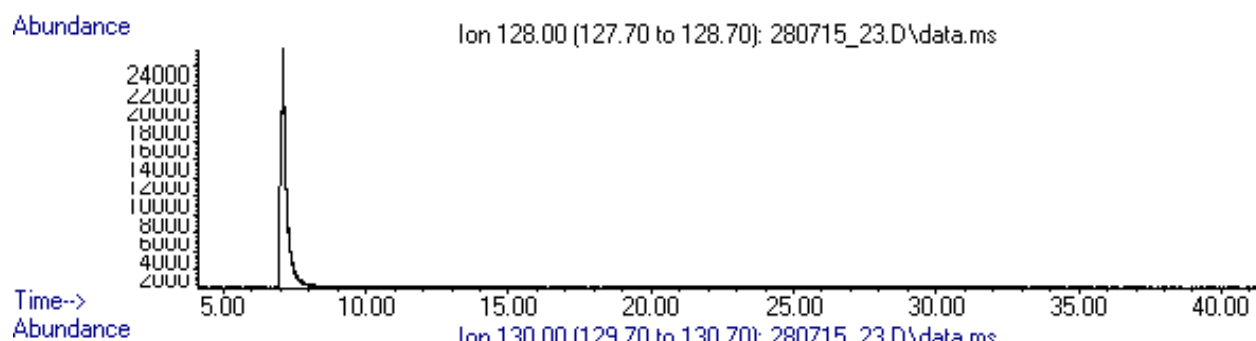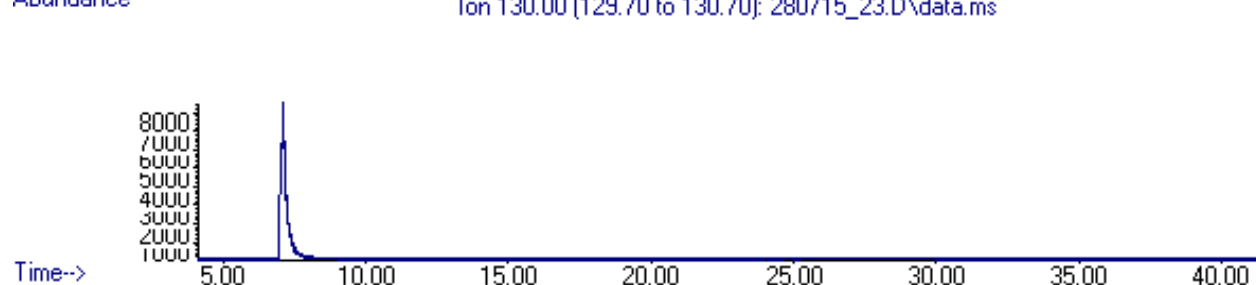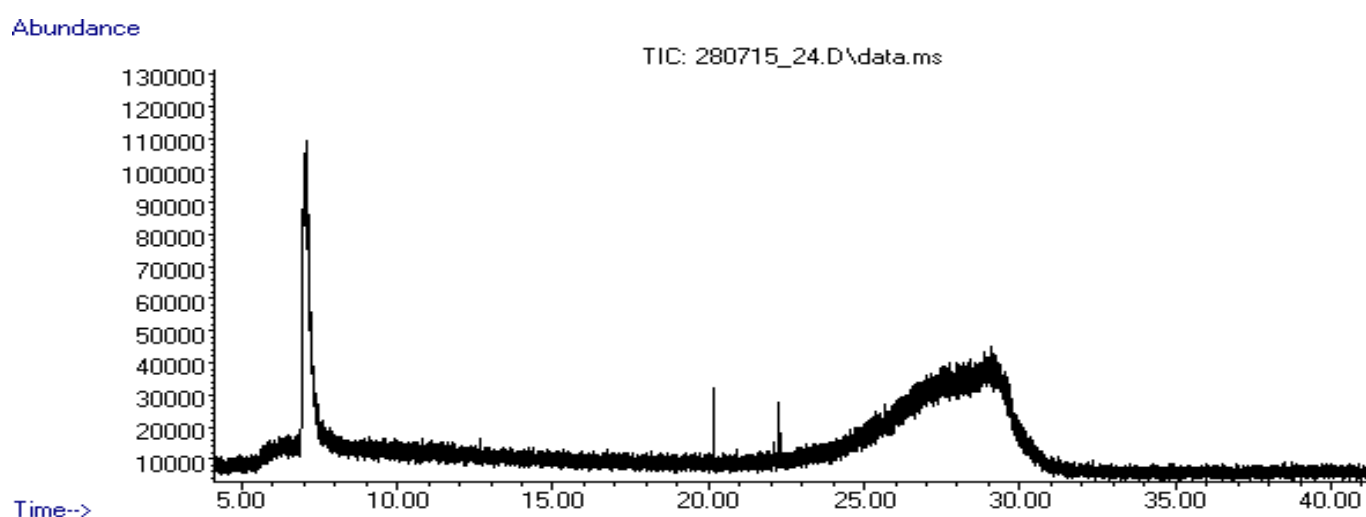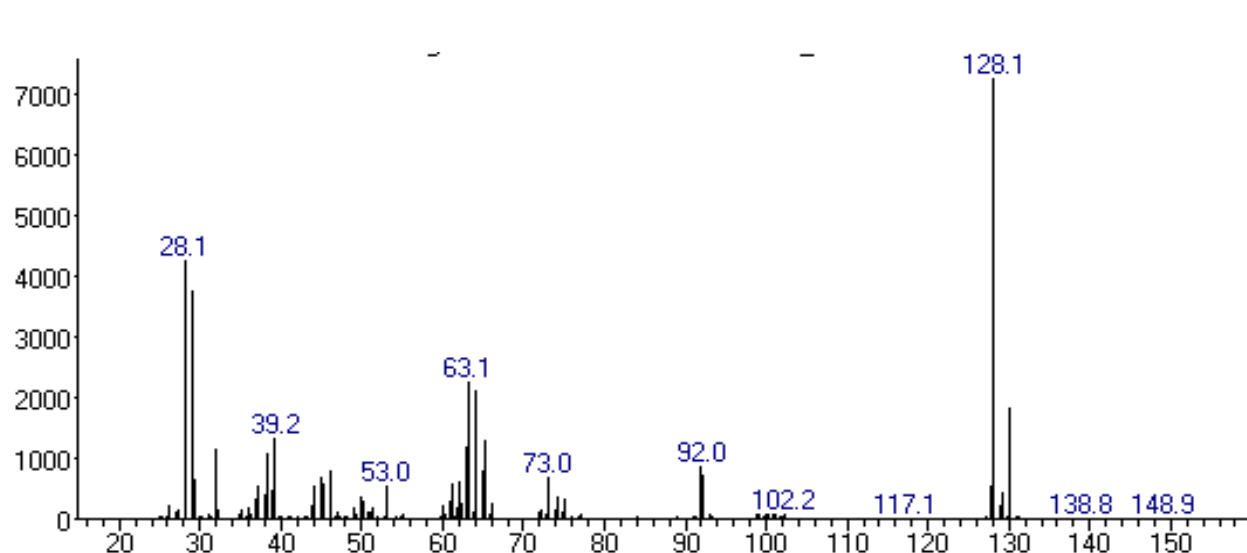

**Figure S8** GC analysis of the initial 2CP solution. A and B) GC chromatogram 2CP standard in water. C) GC chromatogram of the reference solution (diluted 1/3 in water) containing 40 mM formic acid; D) GC-MS/MS analysis of the 2CP peak with retention time of 7min.



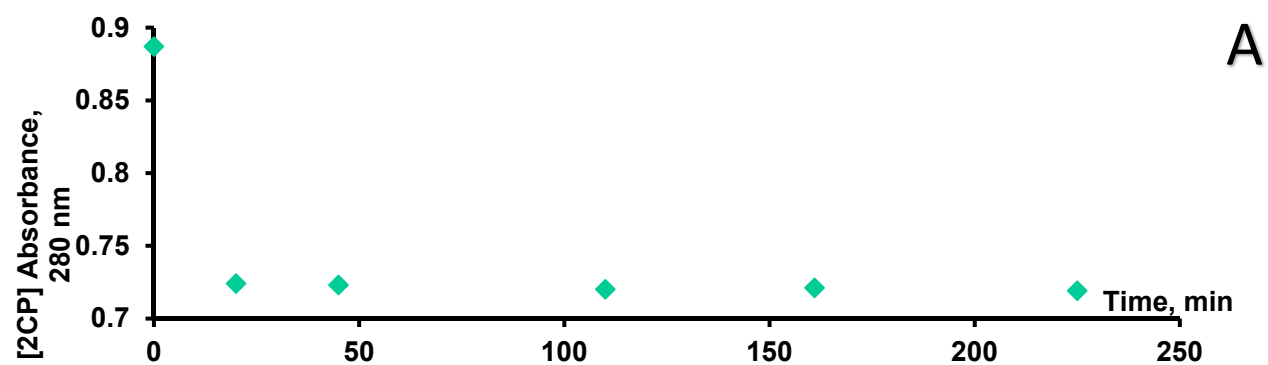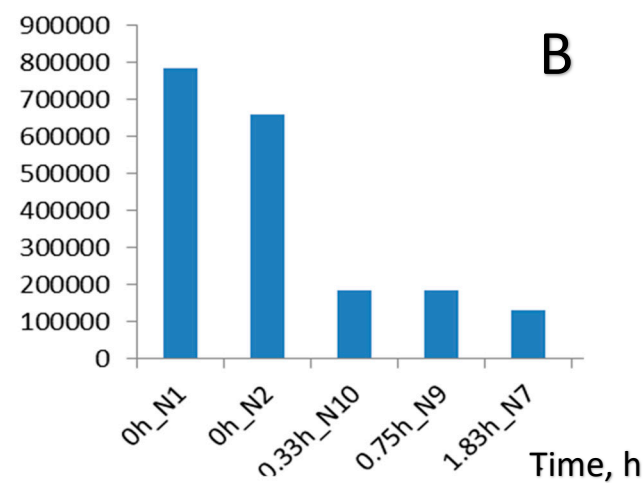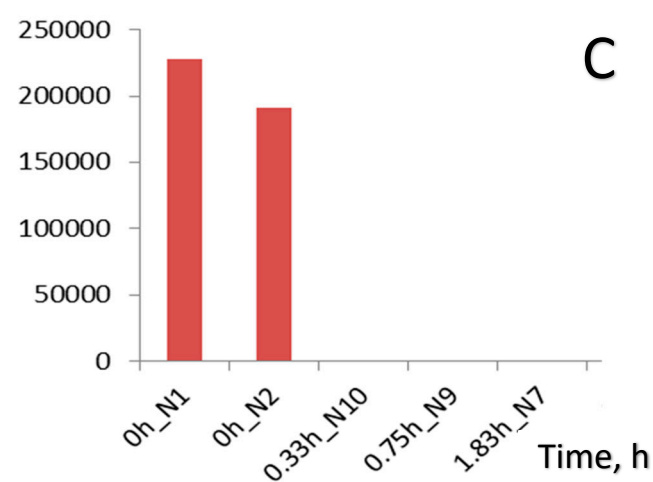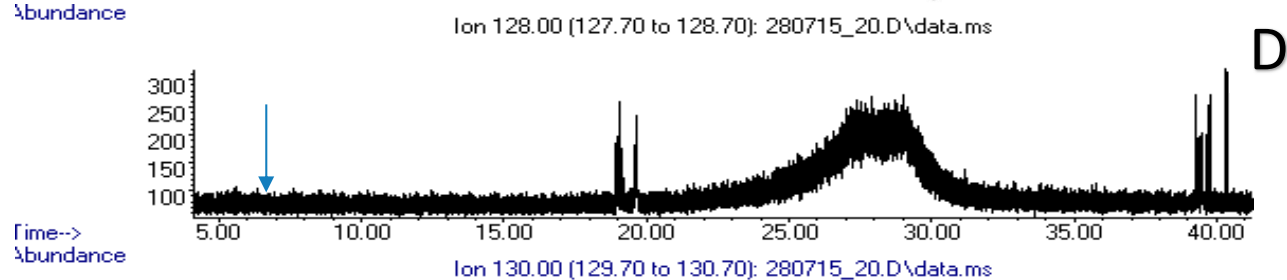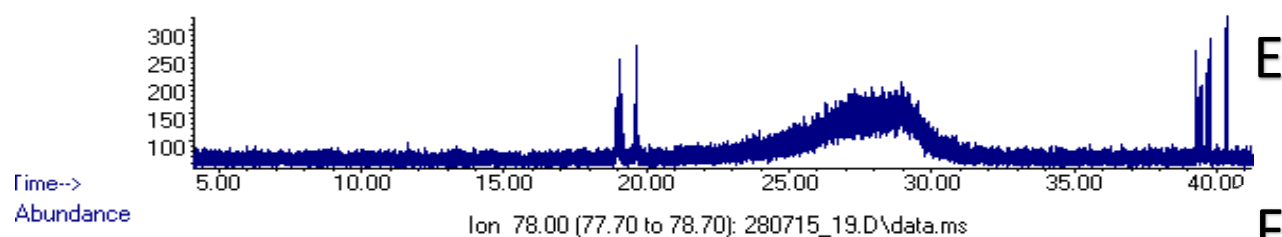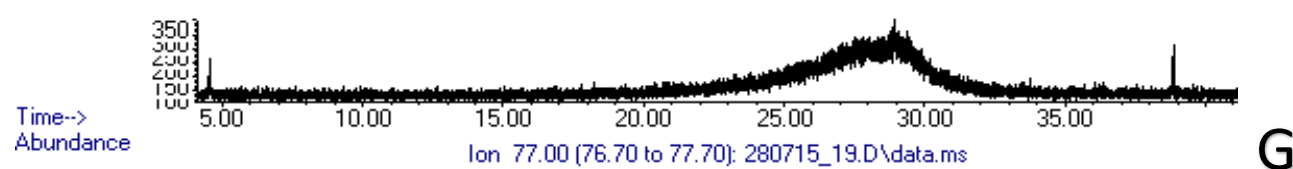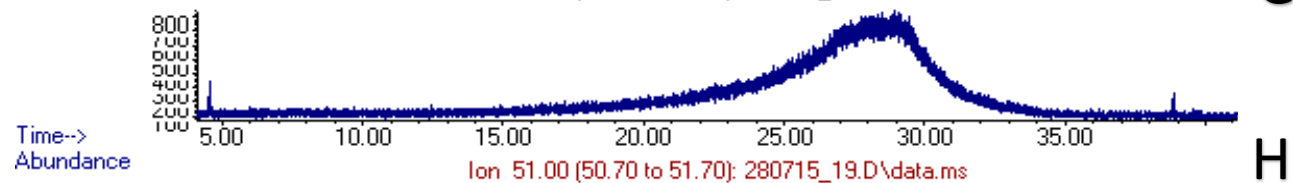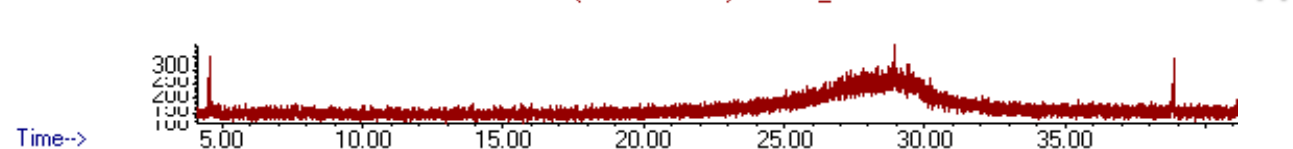

**Figure S9.** Kinetic of 2CP reduction in presence of CHI-GA-PdNPs 0.4 mM (21ug PdNPs) and 40mM formic acid using: A) UV monitoring of the reaction mixture; B) using GC-MS monitoring surface area of the peak for phenol; C) surface area of the peak for 2CP using GC-MS monitoring 2CP LOD estimated 10 ppb; D) and E) 0.75h; C), D and E) 1.83 h at different scanning mode.

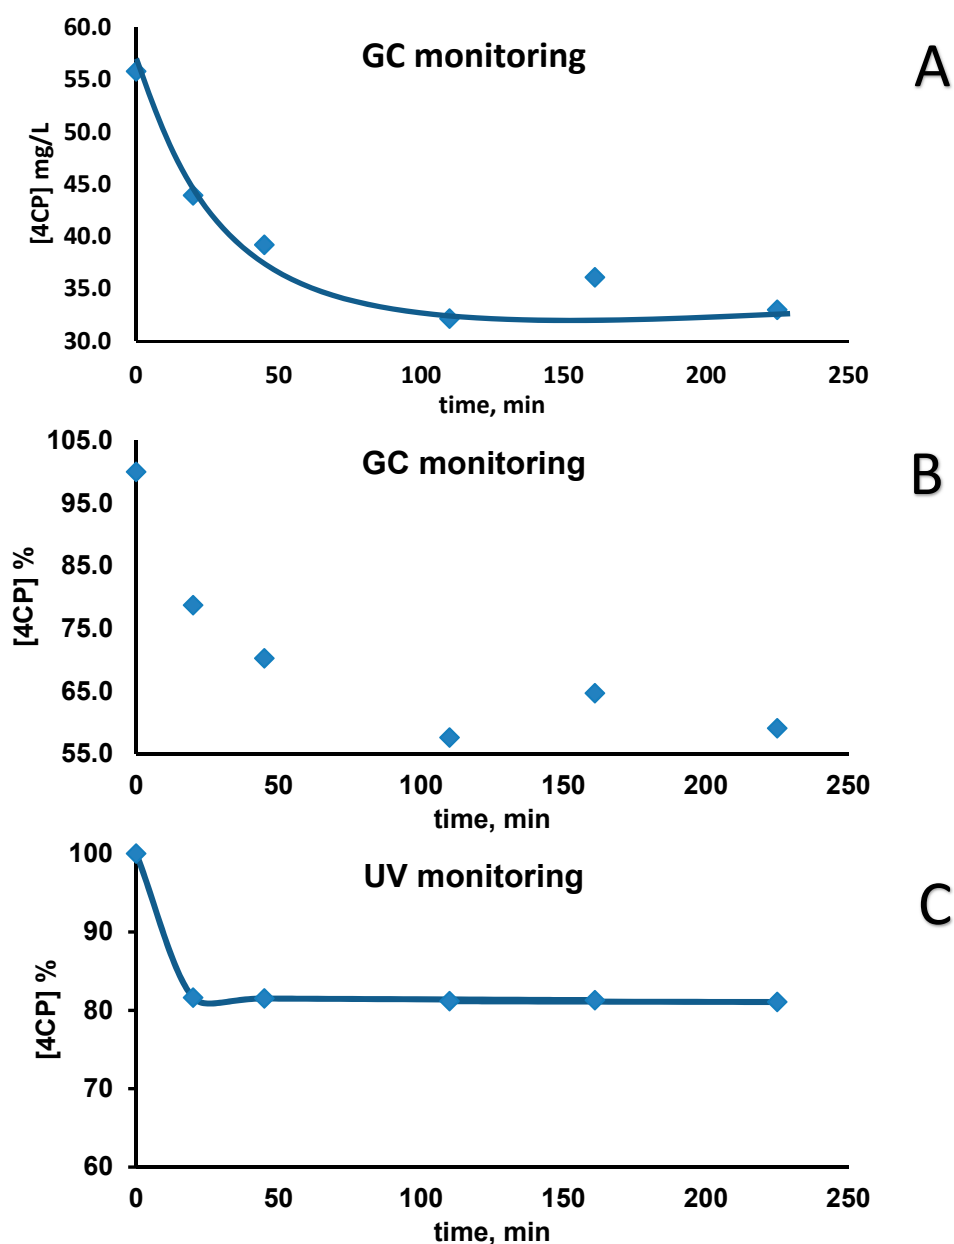

**Figure S10.** Kinetic curve of 4-CP decomposition for 1st cycle catalysed by CHI-GA-PdNPs 0.2 mM (5ug PdNPs): A) concentration GC-MS vs time; B) GC-MS monitoring of concentration; C) UV monitoring at 280 nm.

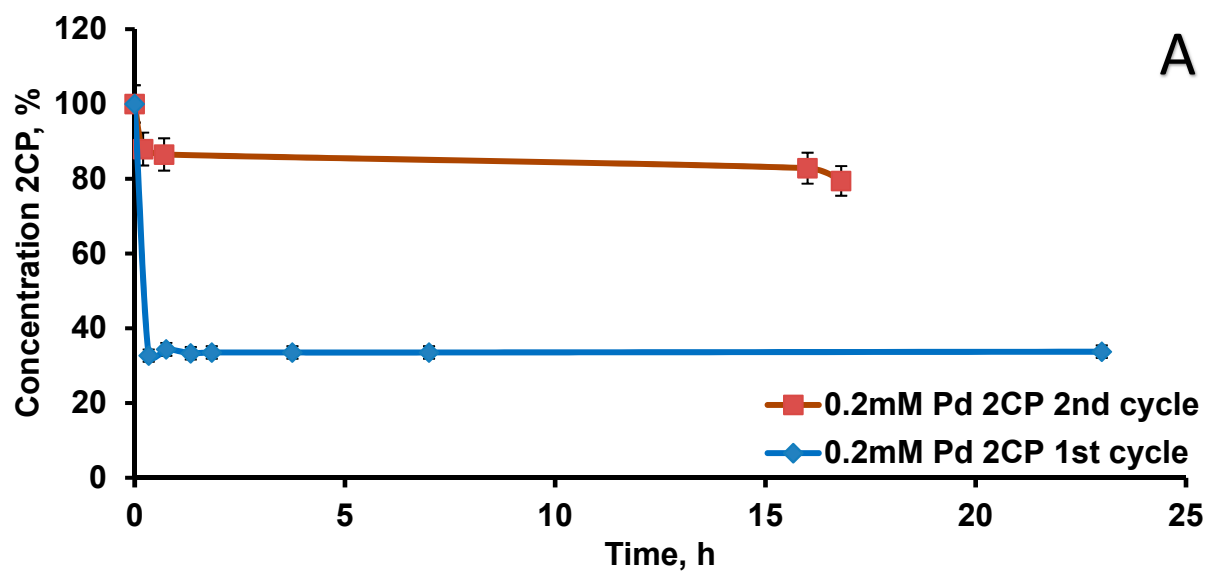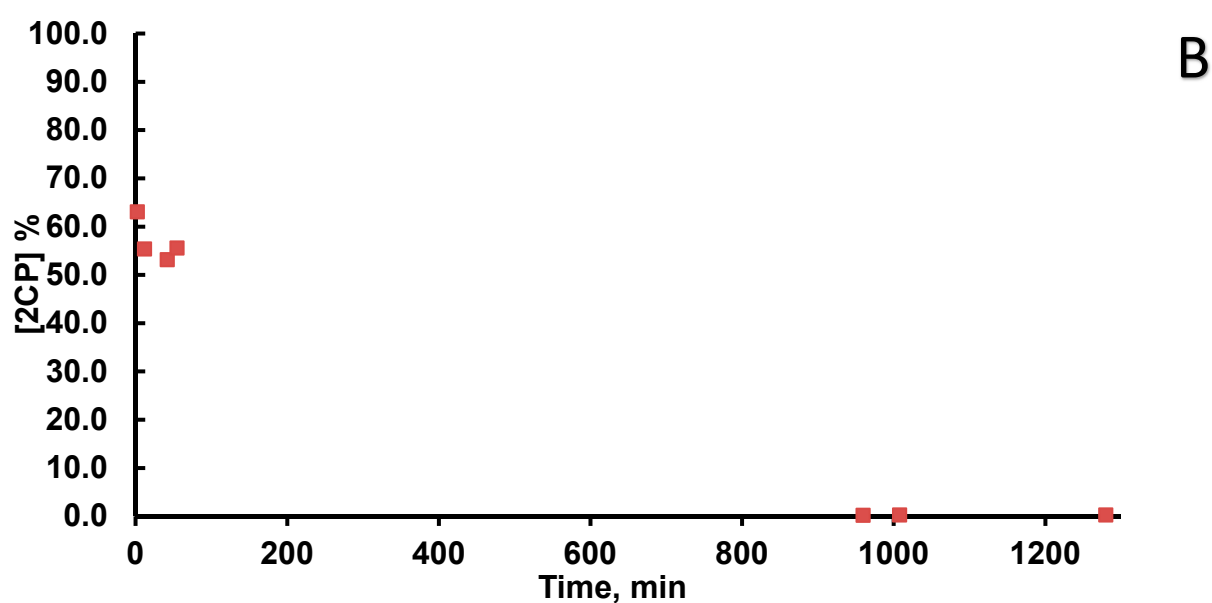

**Figure S11** Kinetic curves of 2-chlorophenol decomposition in presence of cryogels CHI-GA-PdNPs 0.2 mM (5ug PdNPs). B) GC-MS analysis monitoring 2CP; additional degassing performed at 960 min.

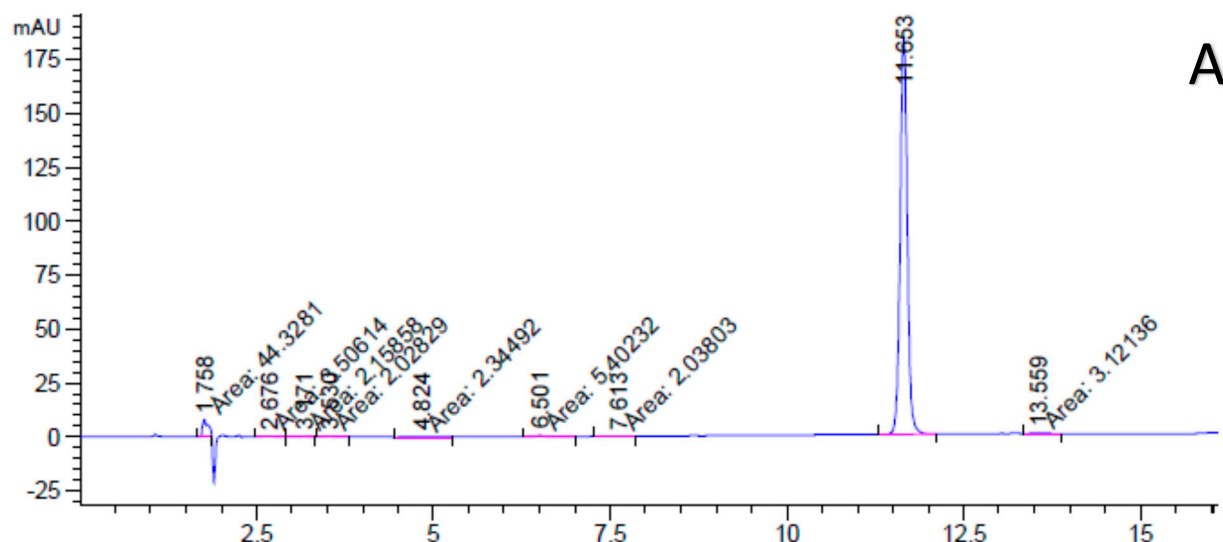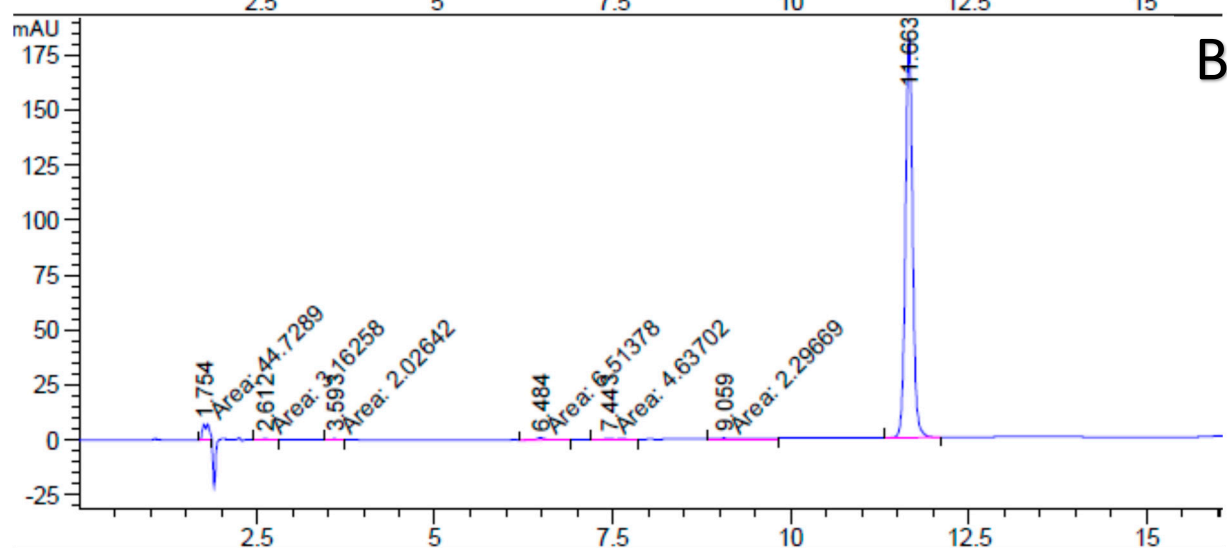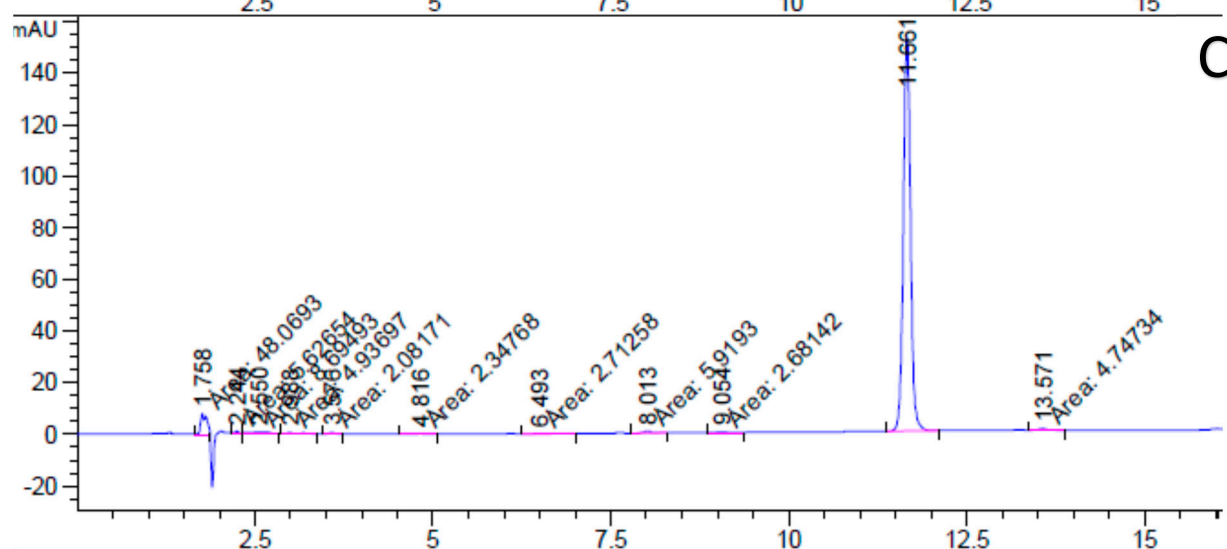



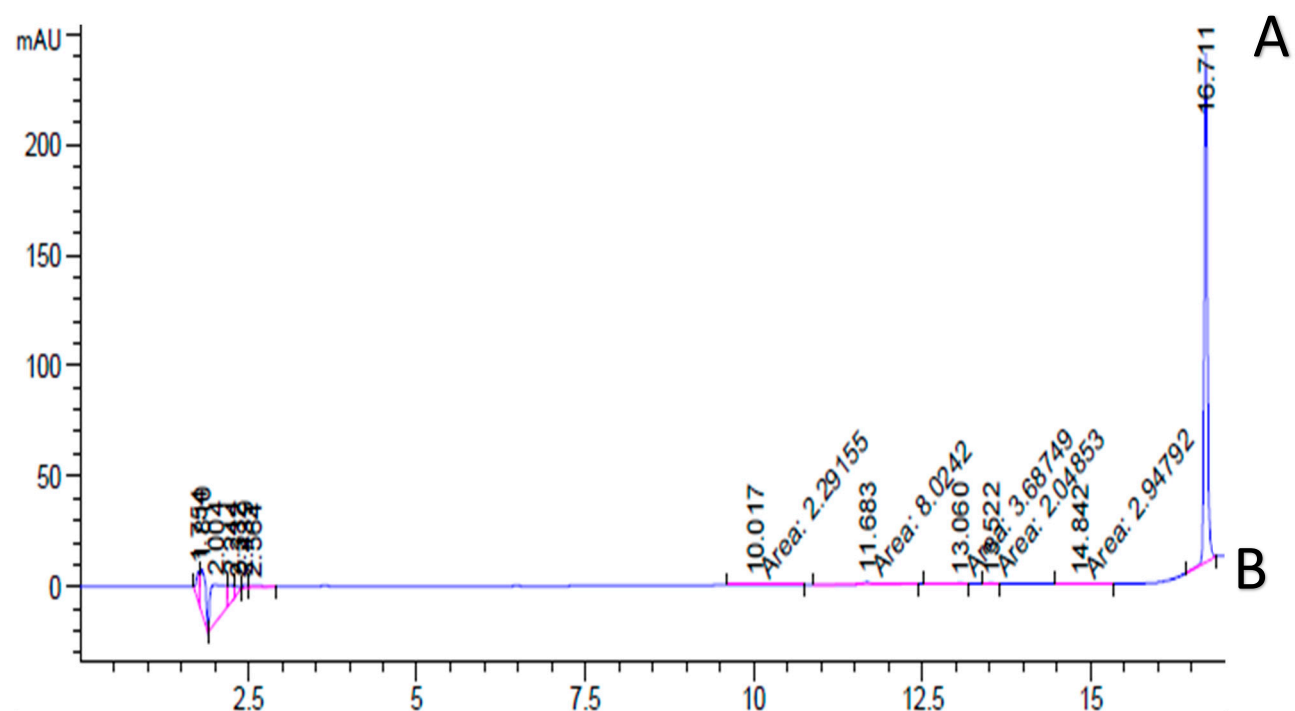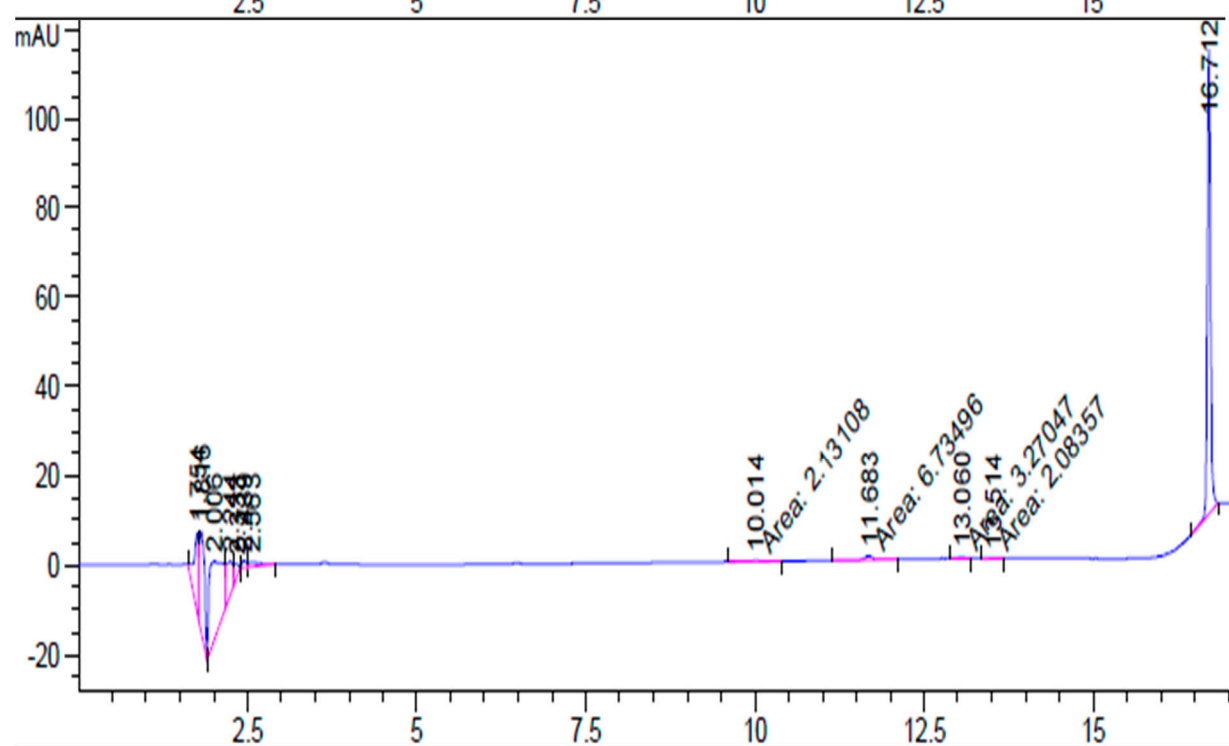

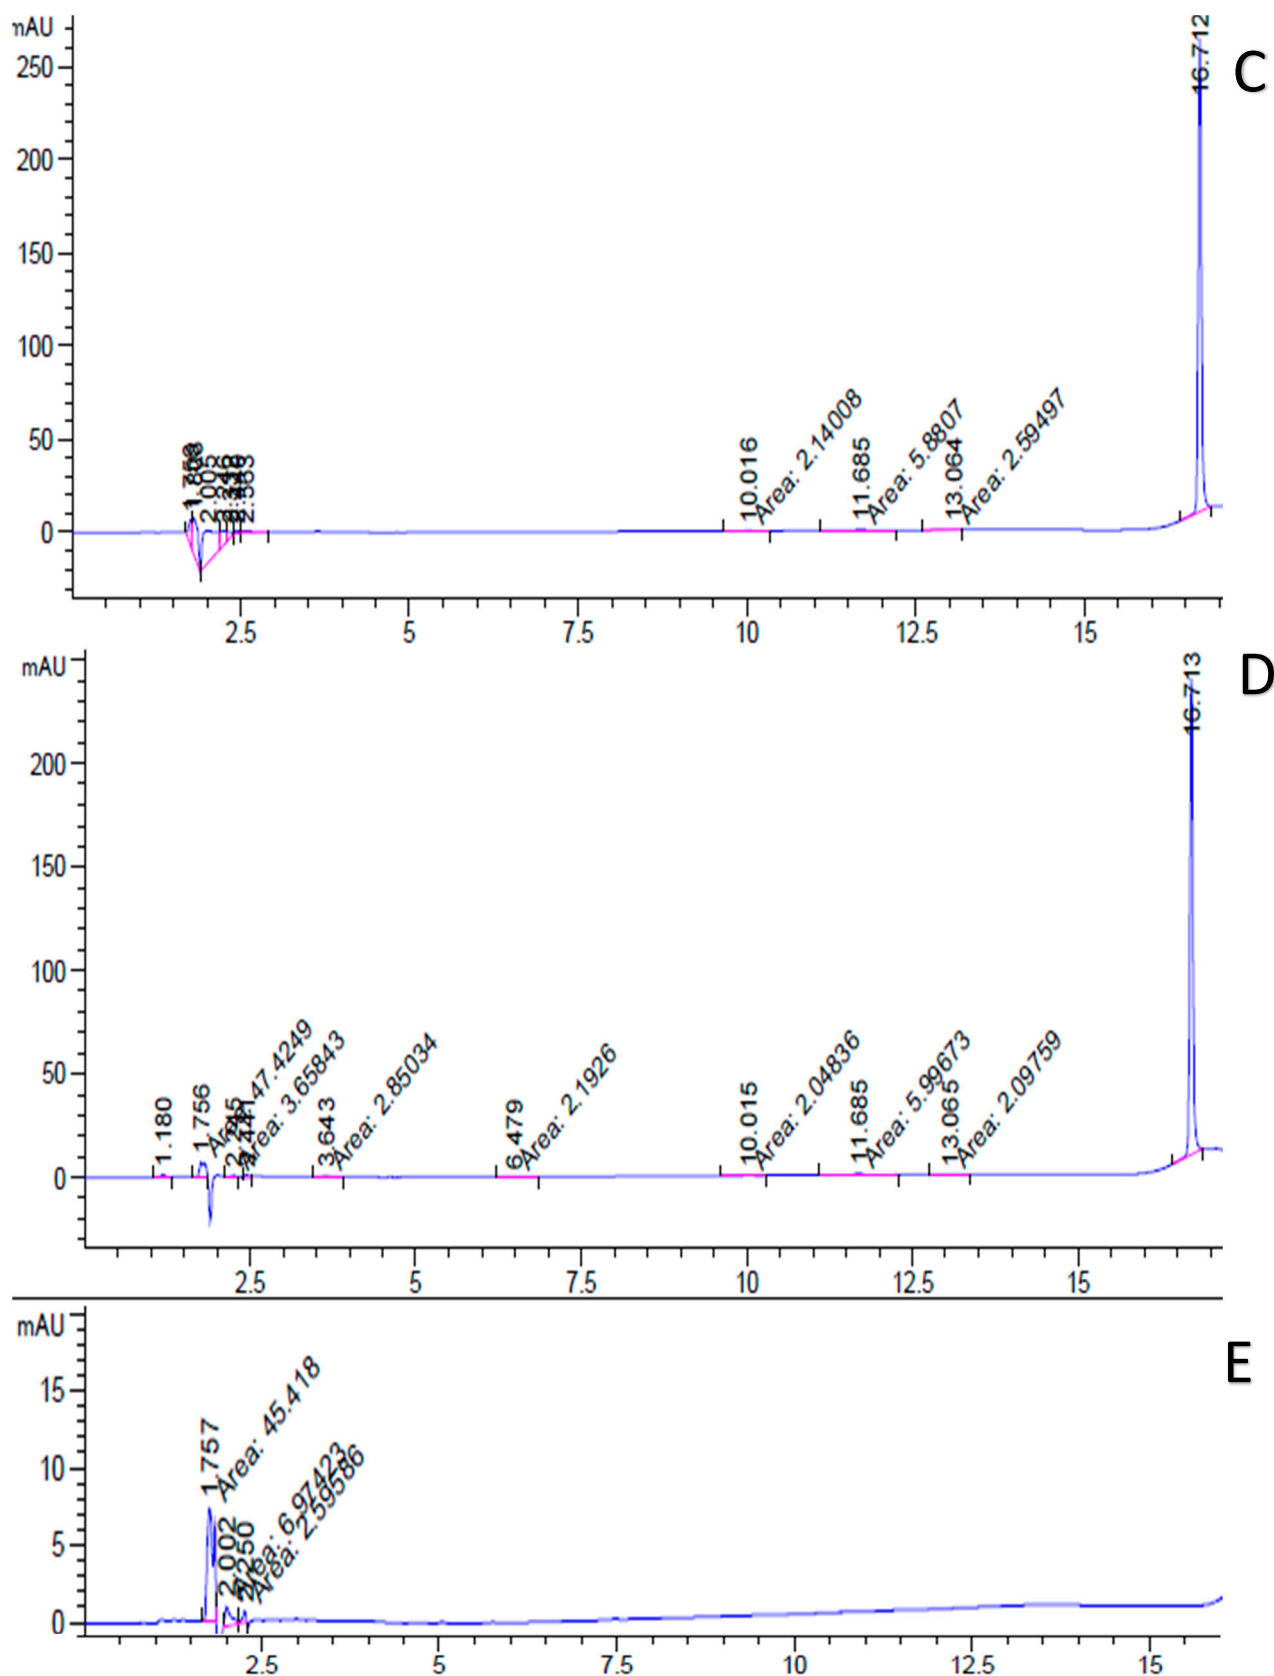

**Figure S13.** HPLC chromatograms of the reaction mixtures of 2,4-dichlorophenol and 20 mM formic acid at pH3 and CHI-GA-PtNPs 1mM (reduced by NaBH<sub>4</sub>): A) 10 min; B) 30 min; C) 1 h; D) 24 h; E) control CHI-GA-PdNPs leaking of other compounds from the scaffold.

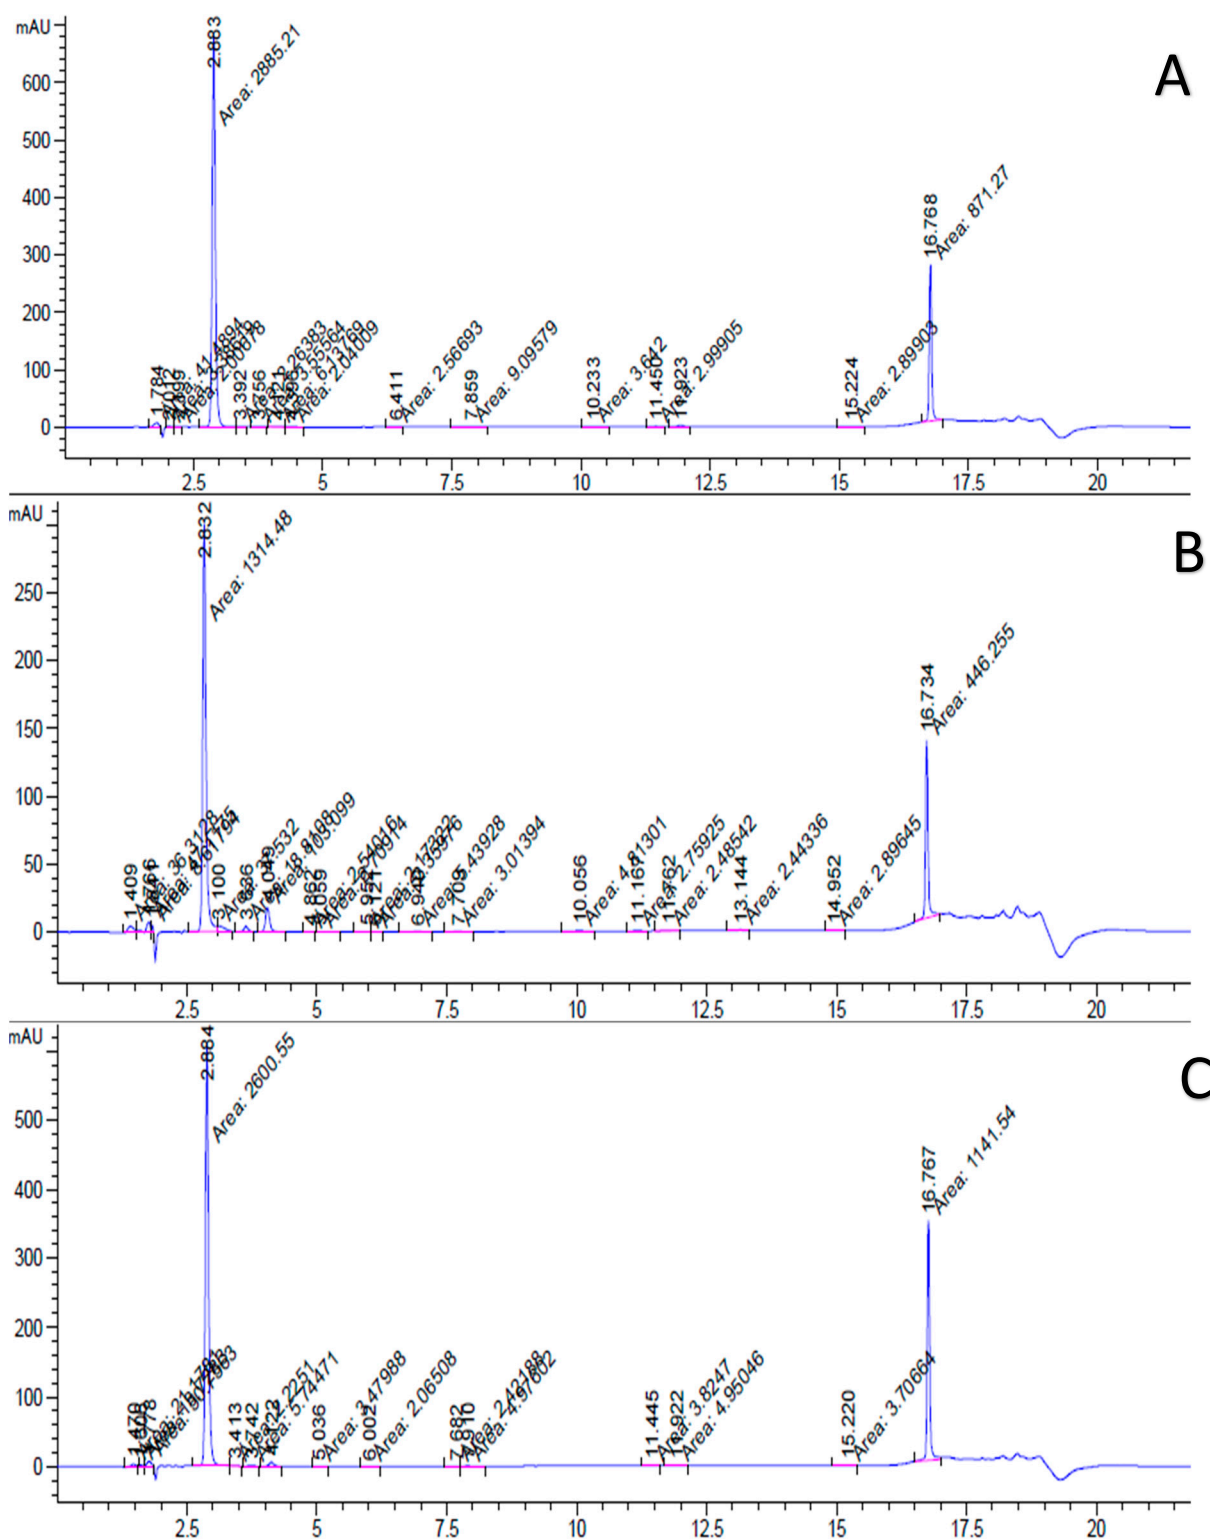



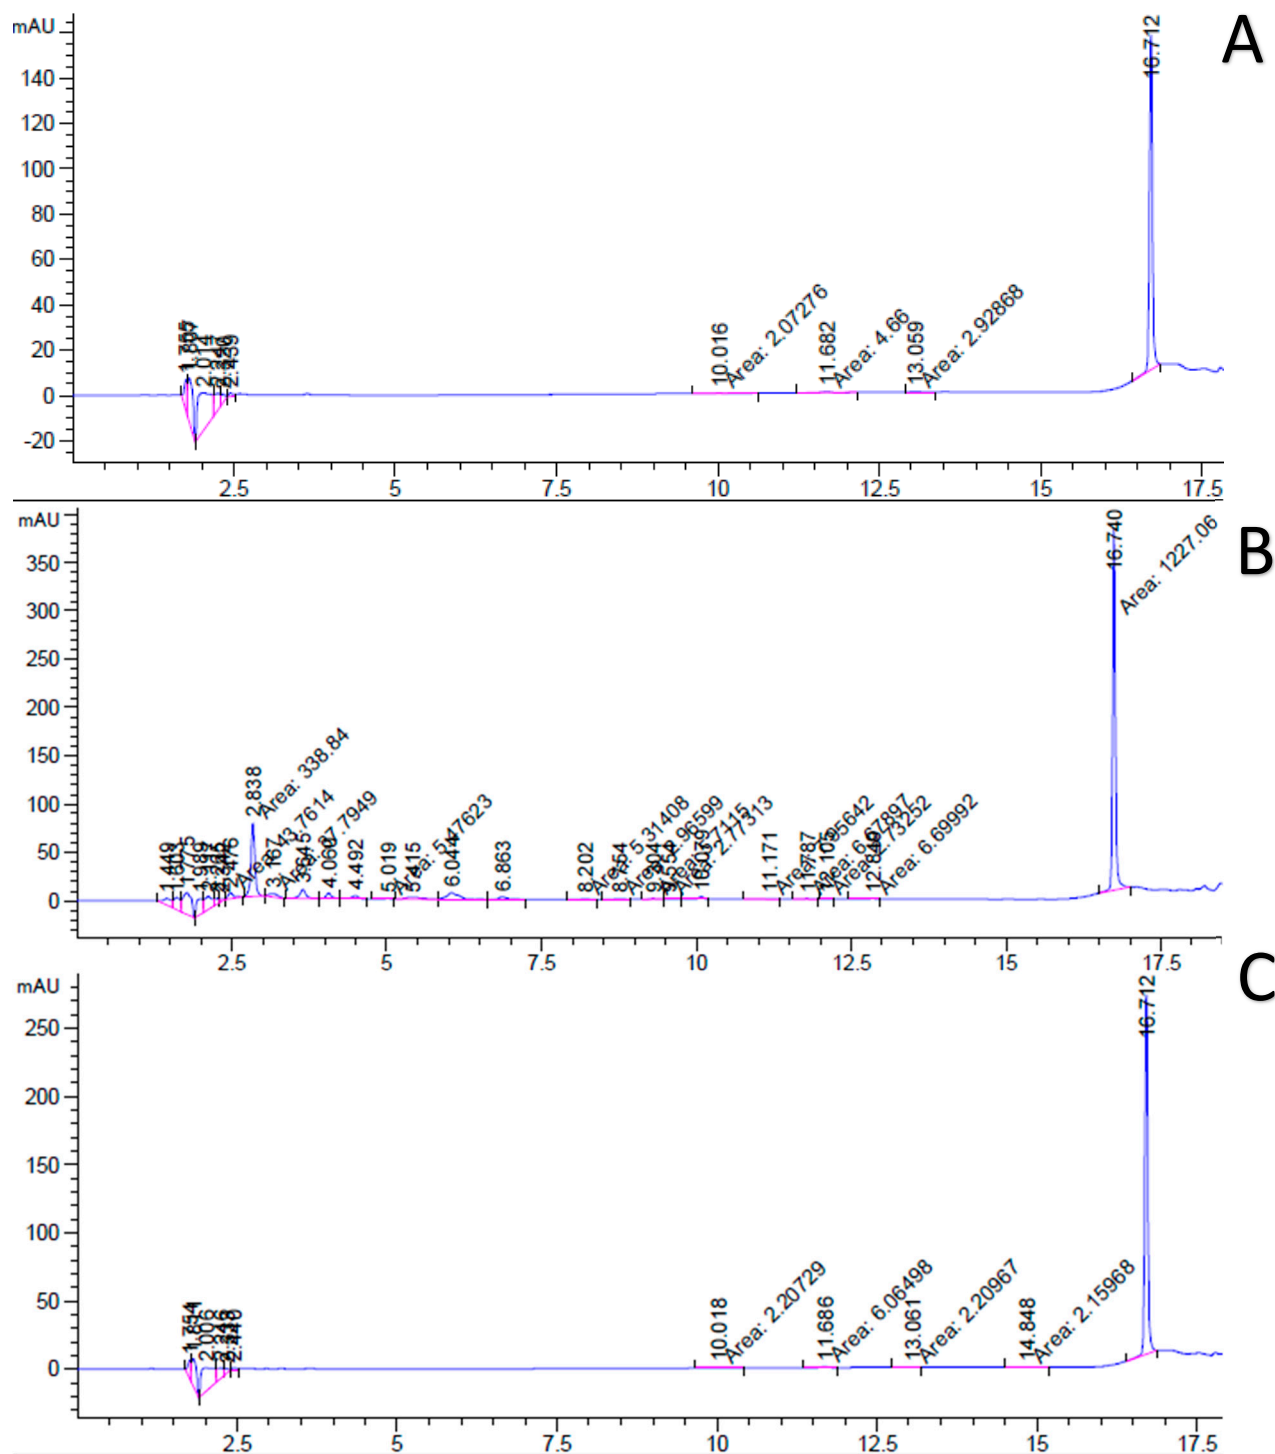

**Figure S15** HPLC chromatograms of the reaction mixtures of 2,4-dichlorophenol and formic acid 20 mM: A) 24h, RT; B) 27h, RT, pH 6.2; C) 96h, RT, pH 3, 0.1mM AgNO<sub>3</sub>; Retention time (min) for compounds were identified as phenol (5.58-6.6), p-hydroxybenzoic acid (3.4), hydroquinone (1.97), protocatechuate (2.39), 2-chlorophenol (9.44), 4-chlorophenol (10.75).
